# Supplementary material
Source: Springer Nature journal article supplement (https://www.springermedizin.de/resource/supplementary/12943_2013_1250_MOESM7_ESM.pdf/9553056)
Supplement: MOESM7 [file 9553056]

## Additional file 7

### Primers used in this study

| Gene             | Primers                                         | Description                       |
|------------------|-------------------------------------------------|-----------------------------------|
| DNMT1-BSP-F      | 5'- TTTAGAGTAGGTGTAATTAT                        | Methylation analysis for          |
| DNMT1-BSP-R      | 5'- CCAAACATAAAATCAAAAACC                       | DNMT1 (Round I)                   |
| DNMT1-BSP-F      | 5'- TGGAATTGAGGATTTTATTTAAGG                    | Methylation analysis for          |
| DNMT1-BSP-R      | 5'- TAATTTCTAACCACCAAAAACTAC                    | DNMT1 (Round II)                  |
| DNMT1-MSP-MF     | 5'- AGTAAATTGTGGAGTTTGGATGAGTTTA                | Methylation analysis for          |
| DNMT1-MSP-MR     | 5'- AACACAAACACCCCAACTTTTCACACG                 | DNMT1                             |
| DNMT1-MSP-UF     | 5'- AGTAAATTGTGGAGTTTGGATGAGTTTA                | Methylation analysis for          |
| DNMT1-MSP-UR     | 5'- AACACAAACACCCCAACTTTTCACACA                 | DNMT1                             |
| DNMT1-RTP-F      | 5'- TACCTGGACGACCCTGACCTC                       | Real-time PCR for DNMT1           |
| DNMT1-RTP-R      | 5'- CGTTGGCATCAAAGATGGACA                       |                                   |
| GAPDH-RTP-F      | 5'- AGGTGAAGGTCGGAGTCA                          | Real-time PCR for GAPDH           |
| GAPDH-RTP-R      | 5'- GGTCATTGATGGCAACAA                          |                                   |
| GCN5-SQP         | Santa Cruz Biotech<br>GCN5 (h)-PR: sc-37946-PR  | Semi-quantitative PCR for<br>GCN5 |
| PCAF-SQP         | Santa Cruz Biotech<br>PCAF (h)-PR: sc-36198-PR  | Semi-quantitative PCR for<br>PCAF |
| E2F1-SQP         | Santa Cruz Biotech<br>E2F-1 (h)-PR: sc-29297-PR | Semi-quantitative PCR for<br>E2F1 |
| DNMT1-ChIP-RTP-F | 5'- TTCTGCACAGGGTATCGCCT                        | ChIP for DNMT1 (Detection         |
| DNMT1-ChIP-RTP-R | 5'- ATCTCGGAGGCTTCAGCAGA                        | by real-time PCR)                 |
| DNMT1-ChIP-SQP-F | 5'- GTATCGCCTCTCTCCGTTTG                        | ChIP for DNMT1 (Detection         |
| DNMT1-ChIP-SQP-R | 5'- GGACGGCCAGTGTGGGCACC                        | by semi-quantitative PCR)         |
| DNMT1-Mutation-F | 5'- TCCCCATCGGTTTCTGCGCGAAAAGCCGG               | A point mutation at the site      |
| DNMT1-Mutation-R | 5'- CCGGCTTTTCGCGCAGAAACCGATGGGGA               | of +182 (C to T)                  |

**List of abbreviations used:** BSP, Bisulfite-sequencing PCR; MSP, Methylation-specific PCR; RTP, Real-time PCR; SQP, Semi-quantitative PCR; ChIP, Chromatin immunoprecipitation; F, Forward primer; R, Reverse primer; M, methylated; U, unmethylated.
